# Supplementary material
Source: PubMed Central journal article supplement (PMC4214120)

### Dataset GSE14468

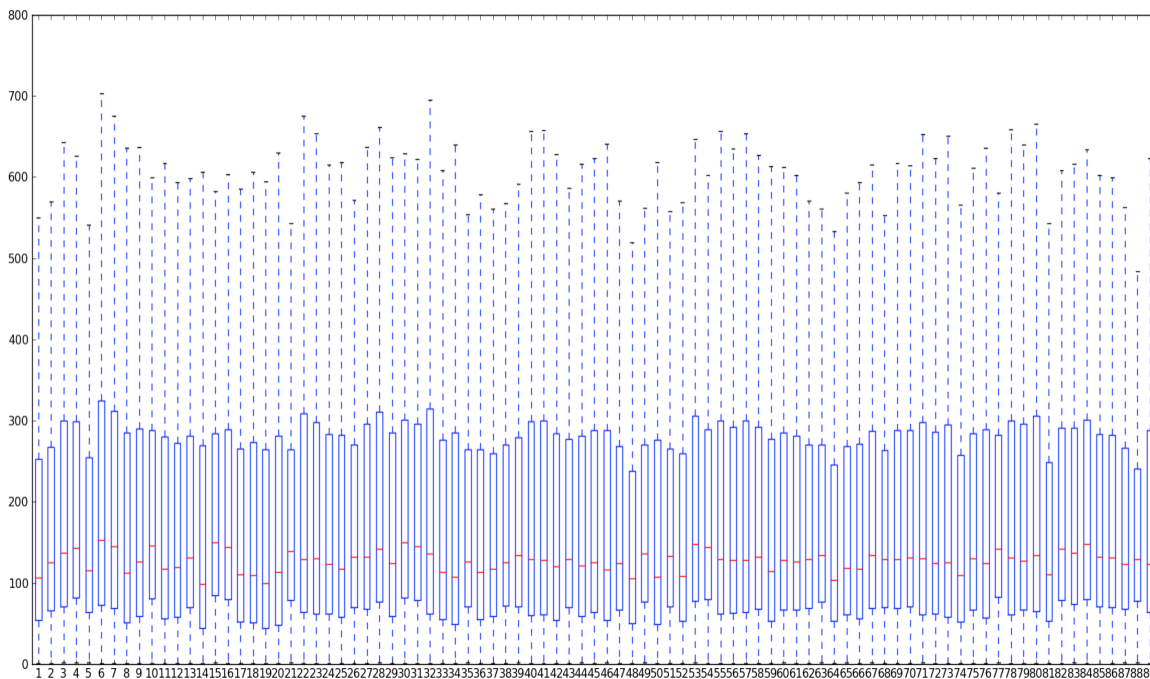

### Dataset GSE15210

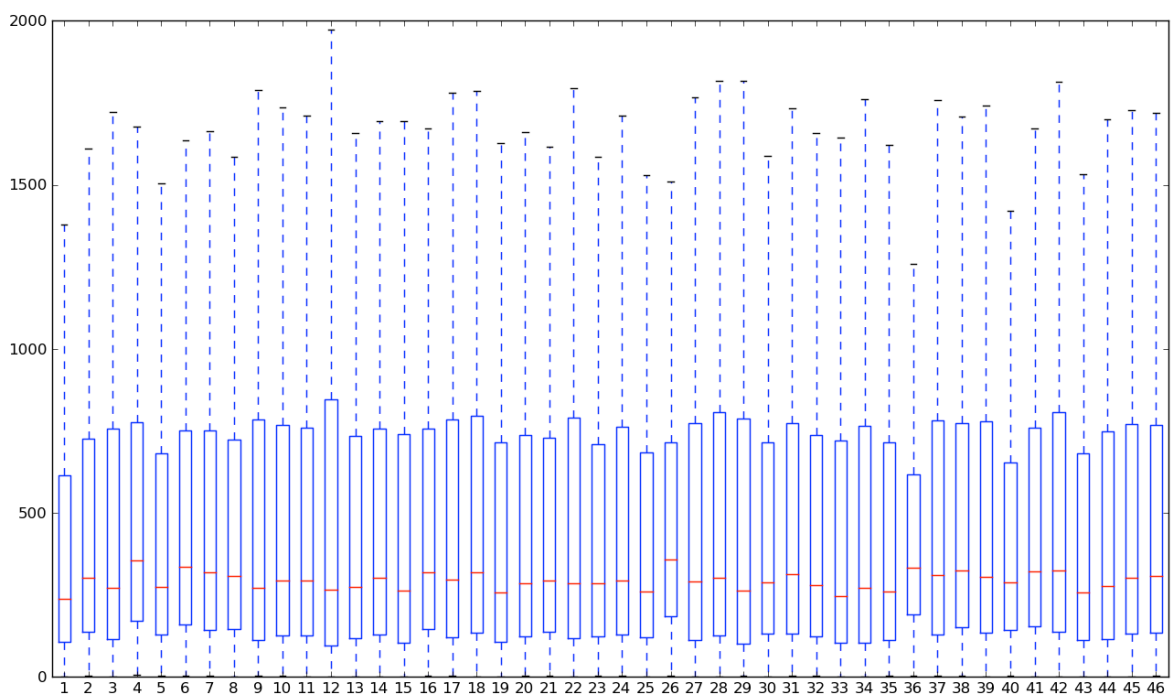

Intensity ↑

Supplement: NIHMS60644-supplement-Supplementary_Figure_2.pdf [file NIHMS60644-supplement-Supplementary_Figure_2.pdf]

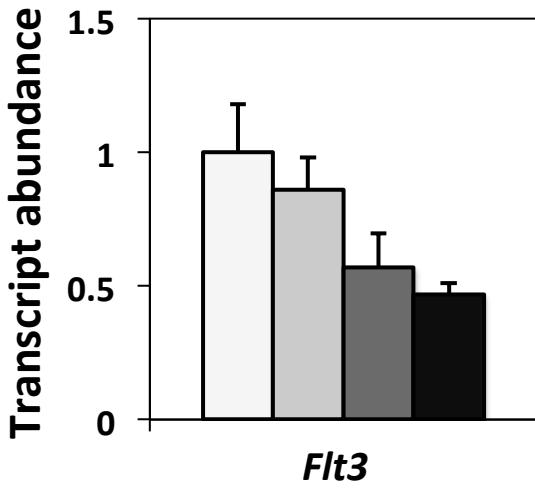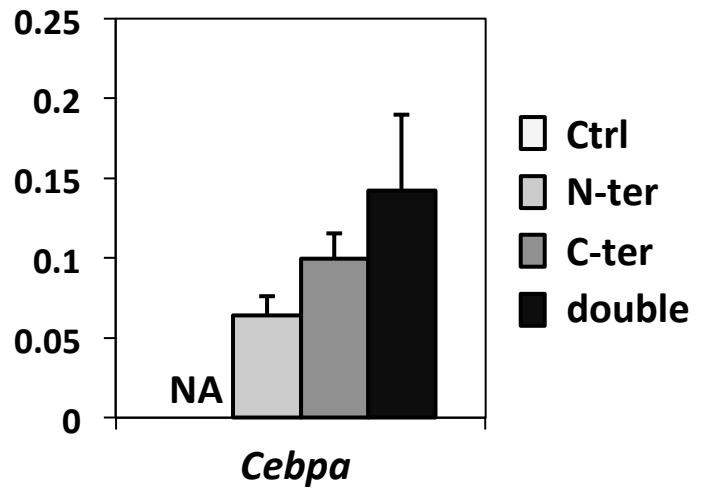

Supplement: NIHMS60644-supplement-Supplementary_Figure_3.pdf [file NIHMS60644-supplement-Supplementary_Figure_3.pdf]
